# Supplementary material for: Machine Learning-Assisted Computational Screening of Metal-Organic Frameworks for Atmospheric Water Harvesting
Source: Nanomaterials (Basel). 2022 Jan 3;12(1):159. doi: 10.3390/nano12010159 (PMC8746952; doi:10.3390/nano12010159)
Supplement: Supplementary file 1 [file nanomaterials-12-00159-s001.zip › Top 200 CoRE-MOFs and hMOFs.xlsx]

## Sheet: top 200 CoRE-MOFs
CSD codea	LCD (nm)	ϕ	VSA(m2·cm-3)	PLD(nm)	ρ (kg·m-3)	Qst (kJ·mol-1)	KH2O (mol·kg-1·Pa-1)	S0[H2O/(N2+O2)]
ACUTOI	0.5192	0.303148	564.359	0.45372	1719.93	149.397	1793220000000000	2.67086e+20		a: CSD code is the number of MOFs in the Cambridge Structural Database. b: The letter before the “_” (or “-”) is part of the DOI number, and the letter after the bar is the attachment index of the article. The same applies to other lowercase code.
ALALUU	0.342062	0.132214	0	0.287452	2035.93	100.798	4967840	3.21354e+13
ALALUU01	0.342309	0.129753	0	0.287759	2039.6	98.7625	2006640	1.12747e+13
AMOZAE	0.325002	0.193037	7.87934	0.276008	2173.34	130.838	1039340000000	1.75311e+17
AQMAND01	0.338568	0.13101	0	0.286973	2082.42	99.2591	1243450	9.96377e+12
ARUYES	0.537817	0.528202	1171.21	0.458095	1478.56	146.289	1662100000000000	9.26226e+19
AWEGEP	0.608145	0.438622	767.589	0.363724	2157.7	130.436	2331170000000	4.76505e+17
AYUWUM	0.454144	0.274302	265.677	0.313863	1259.82	134.703	5858850000000	6.02232e+17
AZILEA	0.419485	0.204102	25.8935	0.270328	1784.77	113.642	556675000	3.24141e+14
BEVQUP	0.287505	0.139353	0	0.245444	1937.85	148.578	821730000000000	4.67777e+21
CAJWIV	0.619996	0.489257	856.37	0.379741	1078.91	307.79	4.30218e+77	6.84914e+82
CARGEI	0.410808	0.0940174	130.058	0.365886	3443.32	122.035	13423100000	1.44685e+16
CAYCAI	0.680768	0.317308	757.835	0.374439	1984.89	130.678	8006850000000	9.56102e+18
CAYKEU	0.690917	0.483398	1127.64	0.551195	1659.26	113.986	1534920000	5.16772e+14
CEZNAY	0.501935	0.260892	282.74	0.293554	2114.41	165.738	1.04647e+18	3.24269e+23
QUTHAP	0.569388	0.438068	654.974	0.440862	1257.79	479.913	2.78083e+124	4.14281e+128
cg200606r	0.428794	0.142683	139.858	0.28499	1759.37	130.613	1523130000000	2.90086e+17
cg8001114-file004	0.497956	0.374385	919.446	0.441476	1619.77	131.223	1462040000000	1.78619e+17
COMGUH	0.479077	0.131968	109.02	0.248027	1958.37	181.882	4.70888e+21	2.16744e+26
CUCSAU	0.55757	0.35184	785.311	0.421324	840.3	100.289	50890600	1.17731e+13
DAPXID	1.41314	0.703718	1710.84	1.20918	764.888	144.292	5.09704e+19	9.66558e+24
DIBJIJ	0.610817	0.355817	525.741	0.416928	1535.4	106.557	121180000	4.17568e+13
DIPMAS	0.587796	0.422866	1293.74	0.478268	1713.91	112.123	782016000	9.30116e+14
DOMGET	0.823499	0.521345	1077.46	0.575611	1194.34	149.41	2534680000000000	1.10438e+20
DORFUM	0.531241	0.390127	474.23	0.365877	1178.99	156.112	3.53181e+16	1.03512e+21
DUFGOB	0.844616	0.457816	1222.63	0.781761	1120.68	111.479	2650740000	1.38535e+15
EBUQEX	0.634635	0.586512	1103.87	0.393297	890.677	129.262	857810000000	5.64995e+16
ECUFAL	0.53241	0.217203	491.719	0.446702	2912.23	247.364	2.52775e+32	1.16901e+39
EVOTIT	0.82912	0.419201	757.649	0.601434	1230.25	124.13	8520930000000	1.53332e+18
FAFDEX	0.484612	0.355333	530.261	0.40465	1412.1	147.18	315908000000000	3.37348e+19
FALVOF	0.665756	0.490593	1552.99	0.45203	1393.74	103.542	38960700	9.62398e+12
FALVUL	0.546026	0.420773	933.713	0.331892	1596.99	111.838	703379000	1.36463e+14
FALVUL01	0.555283	0.431789	992.264	0.337884	1582.5	108.217	101626000	1.79591e+13
FALVUL02	0.546026	0.421117	932.861	0.331892	1596.99	109.374	376201000	7.11647e+13
FARHOX	0.626684	0.446402	847.202	0.362752	1632.3	140.309	19109800000000	2.50631e+18
FARYAA	0.549967	0.197659	406.597	0.260295	3313.52	162.61	7.37843e+16	3.40621e+22
FEVSAC	0.470494	0.219847	215.036	0.378141	1303.42	159.019	2.05709e+17	9.4701e+21
FIVYEP	0.569894	0.366541	1033.41	0.47333	2033.31	163.172	4.54872e+19	3.13628e+25
FIVYEP01	0.569673	0.360716	1032.8	0.473409	2033.31	173.663	1.27432e+21	8.58185e+26
FONQIJ	0.470842	0.407679	596.847	0.366843	1053.75	114.348	1705960000	9.00765e+13
FORWAL	0.610367	0.401495	687.657	0.343163	1140.86	110.025	133872000	2.82119e+13
GAMTUK	0.376828	0.130253	0.147129	0.272919	1811.45	94.2529	8374740	1.13564e+13
GEBCAT	0.782822	0.384558	1043.76	0.428279	1508.19	135.757	9429690000000	2.40618e+18
GOJRED	0.779089	0.341773	362.408	0.285498	1251.4	152.533	2.00862e+16	6.62778e+16
HEDBEZ	0.555376	0.461513	883.156	0.362598	2061.78	103.277	13581000	6.02604e+12
HEDBUP	0.6082	0.47374	1448.76	0.453553	2279.42	96.9173	7039460	6.17851e+12
HEFFEF	0.954316	0.497715	1017.76	0.835309	1171.22	139.445	2489230000000000	3.27302e+20
HEWFUL	0.558263	0.160102	293.035	0.494213	1665.78	271.028	1.62784e+36	1.30658e+42
HISFUM	0.453437	0.281818	340.101	0.381507	1479.23	126.022	40510200000	1.46717e+15
HISGAT	0.566636	0.322454	675.359	0.482933	1374.61	140.669	102825000000000	5.94664e+18
HIYLUY	0.438669	0.293001	431.71	0.277336	2074.2	136.267	6602620000000	5.91453e+17
HIYMAF	0.437654	0.294969	442.953	0.276711	2062.7	142.424	57141100000000	4.57521e+18
HIYMEJ	0.430008	0.301592	385.007	0.272973	2147.23	141.368	54792300000000	3.04195e+18
HOYTUL	0.54823	0.319653	622.462	0.349814	1387.5	120.837	113906000000	2.12137e+16
HUCBAJ	0.586453	0.577476	830.591	0.389751	1200.04	135.137	12945100000000	8.15573e+16
HUTZEB	0.389277	0.279794	31.9861	0.246393	1373.46	136.996	17190800000000	1.55898e+18
HUZSOL	0.996894	0.531404	1136.5	0.800393	905.55	160.54	9.66048e+17	3.74087e+22
HUZSOL01	1.05693	0.654577	1468.58	0.901737	801.73	166.142	8.30523e+18	5.79351e+23
HUZSUR	0.915011	0.567974	1321.7	0.74108	889.947	213.707	9.59679e+27	9.29456e+31
HUZSUR01	0.988153	0.622493	1422.66	0.86684	842.162	255.455	3.18396e+39	2.48041e+43
PIBLUJ	0.594758	0.39479	473.393	0.352279	1304.13	261.185	5.80528e+41	2.34645e+46
ic401765r	0.413244	0.186686	94.1689	0.29785	1544.15	112.935	680988000	1.43402e+14
ic501849g	0.571865	0.214078	265.693	0.246941	2430.6	150.194	5187610000000000	2.86753e+20
ic5018517	0.571865	0.21121	265.981	0.246941	2430.6	148.829	2001570000000000	1.02153e+20
ICITUK	0.767935	0.308015	461.824	0.318432	1220.42	223.927	2.23471e+28	4.87804e+30
ICIVAS	0.579063	0.389052	907.129	0.460472	1334.91	181.992	3.98458e+21	6.37153e+26
IDAZEU	0.274134	0.249859	0	0.245619	2245.15	135.492	4547090000000	2.49702e+18
IJIROI	0.386631	0.188099	314.331	0.287705	2483.17	147.276	218713000000000	6.91835e+18
IQUNAJ	0.282798	0.244569	0	0.251847	1726.63	133.939	5189550000000	1.48779e+18
IQUNAJ01	0.283319	0.254002	0	0.252358	1719.74	133.758	3286920000000	1.0565e+18
ja070671ysi20070130	0.37991	0.256514	3.15476	0.289148	1485.21	131.645	827940000000	3.67447e+17
ja070671ysi20070130	0.388	0.282827	11.3293	0.293704	1460.58	126.911	3041880000000	1.01062e+18
YUJWAD	0.388001	0.262911	16.6154	0.263849	1429.41	265.55	6.35333e+36	9.73318e+41
YUJWAD01	0.398118	0.276463	42.7321	0.269809	1409.42	261.006	1.73181e+36	1.29917e+41
ja073612tsi20070723	0.370012	0.243446	0	0.288428	1480.56	133.056	4670580000000	2.10896e+18
ja5b02777_si_006b	0.383564	0.261033	10.4641	0.270894	1414.41	254.382	1.84736e+34	4.26108e+39
ja0752540-file002	0.388093	0.267602	23.7808	0.268807	1411.36	211.808	1.1824e+29	1.54502e+34
ja508679h	1.15511	0.771533	1864.14	0.831224	1029.27	109.427	11915300000	3066578991052712
ja5103103	1.15511	0.771938	1865.47	0.831224	1029.27	108.072	641314000000	1.65299e+17
JEDJUY	0.50551	0.485978	1278.89	0.414906	1669.62	136.206	14157800000000	3.44306e+17
JIVHIG	0.586134	0.318432	599.623	0.379303	999.22	191.815	1.48154e+23	3.76142e+27
JIWKUW	0.576284	0.305518	476.672	0.339969	1438.37	175.414	1.86236e+20	2.90542e+25
JIYXUL	0.659669	0.37033	1349.37	0.539005	2754.97	138.447	152526000000000	4.2253e+20
KAPGUE	0.349415	0.161385	0	0.251542	1879.85	93.5608	233604	7.93526e+12
KAPHAL	0.348074	0.161332	0	0.248494	1903.81	112.047	344785000	1.07551e+16
KAPHOZ	0.36533	0.423368	971.54	0.250371	1350.23	111.626	1520580000	1.90802e+14
KISPOS	0.737355	0.288092	497.898	0.251949	1432.1	153.03	4956340000000000	6.24344e+20
KITWIV	0.565645	0.507352	1510.68	0.408165	1382.25	122.049	98282200000	3.2135e+16
KIXKOS	0.814141	0.393835	650.093	0.284709	1427.21	147.659	6122220000000000	8.19175e+20
KIYMIQ	0.709051	0.485629	1245.45	0.695471	1037.88	127.412	593409000000	1.19043e+16
LAJKUE	1.61469	0.515842	1104.04	0.768165	1056.13	119.559	257028000000	3.51204e+16
LAZPOT	0.318269	0.0685435	0	0.262491	2073.48	111.558	236578000	6471482889733840
LAZPUZ	0.317075	0.0682196	0	0.261683	2088.94	114.937	1040010000	2.83741e+16
LISZOE	0.355328	0.218092	17.8832	0.300782	1535.5	318.817	7.16231e+44	3.10997e+45
LOJFOF	0.576837	0.402663	783.304	0.502994	1160.35	169.704	2.35791e+19	1.13394e+24
LOJFUL	1.15066	0.764981	1874.89	0.86404	609.859	116.765	262527000000	2.44631e+16
LULWUL	0.364523	0.304777	57.5066	0.32818	1414.94	132.231	1498070000000	7.93802e+16
LULXAS	0.415152	0.347315	158.08	0.342748	1374.6	131.345	888117000000	4.89258e+16
LULXEW	0.397552	0.273154	51.0489	0.295293	1413.41	135.34	8179310000000	6.106e+17
MAMVED	0.837964	0.482025	1201.89	0.434396	1023.59	117.519	26648500000	5035481832035970
MIFSAX	0.624449	0.260675	400.873	0.577613	1466.95	101.897	40844000	2.25881e+13
MUFHUR	0.342	0.169499	0	0.26944	2054.6	103.271	9773290	1.3613e+13
MUZGAQ	0.801686	0.336585	784.33	0.38968	1887.48	100.759	9204380	1.01147e+13
NAKNUK	0.424436	0.173049	46.2308	0.258254	1425.29	123.292	44103200000	1.41055e+16
NATHOH	0.549352	0.311622	760.454	0.397351	2173.18	186.406	2.48149e+21	1.44017e+26
NAYMOQ	0.4042	0.166097	93.4108	0.349537	1209.72	169.114	3.37775e+18	1.87947e+24
NEDJAJ	0.522097	0.342045	694.561	0.298806	1836.64	151.701	2434210000000000	7.49464e+20
NEVGIE	0.292259	0.0201835	0	0.249353	2148.26	97.7572	439951	7376382167320179
NEXDOK	0.715126	0.417653	1058.06	0.356969	1072.89	163.107	3.12939e+18	4.41769e+23
NEXXEV	1.01434	0.67944	1581.23	0.960102	701.933	125.828	2251090000000	1.49394e+17
NEXXIZ	0.973301	0.67699	1565.91	0.922346	709.275	127.969	9165920000000	5.66963e+17
NEZWOG	0.642146	0.429809	1375.07	0.518121	1713.65	102.705	34220000	2.84497e+13
NEZWOG01	0.615081	0.430589	1365.19	0.494067	1686.33	99.9846	6467220	7.07816e+12
NOCYUB	0.454438	0.229424	315.594	0.410807	1725.58	121.754	484446000000	2.45781e+17
NOCZAI	0.442954	0.225224	299.728	0.404745	1744.83	131.173	2720470000000	1.32062e+18
OKINIG	0.41071	0.295273	26.7316	0.30438	1288.12	175.843	1.66182e+21	8.48177e+25
OPOBOL	0.322773	0.0848222	0	0.264519	1972.88	104.53	17040600	9.62639e+14
OVADAR	0.51368	0.447252	721.021	0.379878	1210.89	163.625	5.00954e+17	1.26356e+22
PAPYOW	0.755656	0.626223	2559.1	0.584534	1131.14	97.8481	12205600	1.17812e+13
PAQVOU	0.512551	0.46505	698.065	0.442052	1104.34	239.259	6.76795e+30	1.27401e+34
PEJMOI	0.777261	0.386482	821.047	0.472411	1789.18	186.212	7.97436e+23	7.8992e+26
PEQRUZ	0.568716	0.502667	923.05	0.477458	1197.14	132.625	2868590000000	3.16172e+16
PETVEQ	0.676448	0.647832	2452.03	0.552702	644.93	104.029	535022000	2.75598e+14
PIKBUH	0.401814	0.090351	85.4033	0.284803	1975.64	110.924	95126500	5.18913e+13
POKSUF	0.399213	0.149709	83.8772	0.301057	2038.55	114.167	3772930000	8.69537e+14
POKTAM	0.402027	0.154733	113.549	0.297364	1966.98	124.508	258052000000	3.166e+16
POKTEQ	0.400605	0.154467	109.751	0.296923	1992.37	119.807	28516100000	3.81738e+15
POKTOA	0.403898	0.155104	138.575	0.29855	1932.21	105.459	19051100	6.85083e+12
POKVUI	0.403047	0.155938	124.285	0.298599	1944.89	119.99	8516840000	1205793125788233
POWBIO	0.433651	0.193865	142.64	0.260201	3660.65	106.562	14377300	2.60014e+13
PULDOQ	0.436629	0.206442	405.487	0.248463	3352.2	142.239	96134200000000	1.02227e+20
PUPHUE	0.711215	0.384395	901.578	0.670655	937.08	132.732	17869300000000	9.80839e+17
PURQID	0.497955	0.265969	373.25	0.241919	1692.77	140.915	53508600000000	7.78864e+18
PUWYAI	0.394407	0.23785	124.704	0.270576	1531.08	175.778	1.36215e+21	6.54653e+26
QASSUZ	0.820384	0.315445	926.681	0.794678	1223.17	97.0164	18006900	7.79641e+13
QISKIN	0.453693	0.218589	225.6	0.339137	1509.83	166.484	1.41108e+18	1.52679e+22
QUFTAM	0.497686	0.355225	584.254	0.454571	1565.92	153.764	2.20085e+17	5.97447e+22
QUQGAL	0.524917	0.465519	893.421	0.37405	948.376	146.42	580047000000000	2.93005e+19
QUSCAJ	0.541421	0.432838	817.582	0.375067	1170.99	215.462	1.11939e+27	3.23994e+30
RAZXIA	0.767887	0.396394	1098.18	0.423308	1561.37	145.955	828752000000000	9.9021e+19
REFJET	0.627741	0.436921	996.621	0.587073	1483.18	189.408	1.86934e+22	2.61084e+27
RIPWEU	0.536705	0.243252	591.189	0.328695	3958.43	164.526	5.27621e+21	7.87971e+27
RUTBUE	0.546179	0.443737	890.876	0.33167	1848.31	132.334	4872060000000	7.23617e+17
SAHNIZ	0.737617	0.25392	493.103	0.280668	1299.41	182.707	8.84109e+21	7.8263e+27
SAKNOJ	1.54818	0.768784	1629.06	0.859451	827.332	142.361	1.69667e+16	1.17992e+21
SEVWEV	0.31447	0.127922	0	0.252683	1948.84	93.2639	386314	1.76857e+13
SIFVAG	0.552904	0.266148	560.765	0.349181	1162.43	107.365	156040000	4.62387e+13
SOPPOD	0.285187	0.251835	0	0.258084	2083.03	123.47	51085400000	3.71691e+16
TAPXIT	0.577413	0.229246	465.215	0.541483	1578.08	158.739	3.62934e+16	2.06467e+21
TAPXIT01	0.569893	0.217388	443.743	0.536843	1578.08	155.233	1.85318e+16	1.56921e+21
TAPXOZ	0.55044	0.198016	407.687	0.513657	1558.67	154.456	6140100000000000	7.86466e+20
TEYLIU	0.392448	0.15266	60.9075	0.298813	1962.58	121.584	81221400000	1.21542e+16
TIDMEA	0.605011	0.420719	1306.17	0.495275	1747	118.392	34818300000	3.41389e+16
TIKMUW	0.497756	0.318599	437.724	0.31317	1566.65	110.57	609022000	5.90249e+13
TIQGUW	0.496978	0.21218	92.538	0.343779	1577.04	160.874	6.1796e+17	4.14702e+23
TIQHAD	0.494141	0.206426	80.2618	0.341905	1595.93	158.694	1.24956e+17	8.73308e+22
TIQHEH	0.493102	0.214064	80.8236	0.344222	1590.19	163.326	1.29327e+17	8.52265e+22
TIQHIL	0.495366	0.208001	78.1987	0.341712	1609.79	158.906	1.02797e+17	7.01363e+22
TUMGOX	0.34731	0.267857	0	0.261221	1870.19	103.038	36861600	7.04052e+13
UGUHAG	0.484717	0.446805	616.739	0.436591	1779.59	106.599	166418000	1.11262e+14
VAYDOQ	0.411487	0.282574	42.4452	0.254213	1376.65	149.898	1620070000000000	9.98522e+19
VEHNED	0.381176	0.234008	134.629	0.256225	1435.2	127.969	1468330000000	1.00597e+17
VEZMIY	0.381183	0.360471	351.518	0.309194	1376.83	156.265	2.49191e+16	4.58954e+20
VEZMOE	0.381259	0.362558	342.679	0.309553	1379.54	152.151	1.16569e+16	2.08191e+20
VIGNOQ	0.875461	0.498476	1233.57	0.312932	1429.77	116.211	31137200000	1.74431e+16
VIWKOD	0.665159	0.492677	1562.74	0.457304	1382.05	98.0025	51836300	1.73239e+13
VIWLOE	0.548118	0.42094	971.503	0.331383	1580.06	105.713	620132000	8.28266e+13
VIWMAR	0.555555	0.433958	1024.12	0.341902	1588.85	102.04	26677400	6.87829e+12
WAJHIA	0.358932	0.0902777	0	0.265715	1642.56	104.1	13662300	1.45862e+13
WAJHOG	0.641579	0.515284	1209.35	0.606601	1244.24	187.74	4.37268e+22	1.07006e+26
WAJHUM	0.749298	0.546899	1273.15	0.727468	1234.65	117.039	26345900000	5205094871936715
WAJJAU	0.749834	0.543829	1274.08	0.725853	1232.75	124.371	1970960000000	3.97804e+17
WAJJEY	0.749347	0.549292	1274.89	0.726736	1231.2	118.983	657528000000	1.23094e+17
WAJJEY01	0.749295	0.544945	1275.22	0.726641	1231.2	126.907	5120960000000	9.39223e+17
WAJJOI	0.748832	0.547124	1276.21	0.72547	1233.79	124.065	4696480000000	8.89998e+17
WAJJOI01	0.748188	0.548167	1277.8	0.724433	1233.79	120.468	70589500000	1.29261e+16
WENSIS	0.274956	0.250312	0	0.243909	1625.34	133.95	2901380000000	1.56075e+18
WERKUZ	0.365332	0.0648753	0	0.297956	1782.94	103.706	185767000000	3.40709e+18
WIKYAQ	0.556765	0.21948	391.228	0.422978	1176.26	139.973	24091100000000	7.39211e+18
WOCJII	0.401204	0.12862	5.52747	0.257448	1574.83	135.456	5900650000000	3.32062e+18
WUPNIF	0.410645	0.324594	849.692	0.309037	1773.5	119.151	8659180000	3457637040309843
XEKCOH	0.411737	0.191262	175.255	0.251535	2264.51	163.222	4.15495e+17	9.41166e+23
XILDUT	0.533112	0.407972	1220.52	0.397403	1325.73	166.644	8.38346e+17	3.22211e+22
XOFTIW	0.388264	0.0804736	5.89078	0.328878	2438.1	102.349	5142410	2.13626e+13
XONGUD	0.838841	0.412763	1231.12	0.691725	2684.57	124.279	84223900000	1.34888e+17
XOTXAG	0.45925	0.417776	686.914	0.372441	1455.22	169.093	7.25916e+18	1.99119e+23
XOVQIJ	0.741561	0.522895	1295.97	0.413146	925.044	115.022	2824790000	3.96971e+14
XUVGUQ	0.567343	0.196997	217.052	0.367394	2376.14	115.778	31854600000	9353140924285734
XUVGUQ01	0.566624	0.198452	217.284	0.367279	2374.96	119.181	6239840000	1.90847e+15
YAFGAP	0.274525	0.237255	0	0.244183	2321.42	113.203	950068000	2217355281245551
YENLUA	2.14922	0.631254	1211.96	1.89061	794.829	163.325	4.64724e+18	1.44484e+24
YEQRER	0.587384	0.648772	3120.15	0.47032	1159.67	103.341	1069990000	1.01873e+15
YEQRIV	0.599633	0.64794	3232.28	0.479932	742.266	95.6691	252348000	1.92879e+14
YIGFIF	0.444183	0.290665	459.318	0.332862	1974.86	120.316	5264960000	4635984405715556
ZADDAJ	0.358243	0.265108	0	0.304985	1447.8	252.555	4.7873e+33	2.17668e+37
ZARQAM	0.763314	0.431703	1185.18	0.694265	2764.8	148.003	2171960000000000	4.04358e+21
ZEKRIS	0.56482	0.543615	1165.99	0.4818	1034.67	181.817	1.41895e+21	8.21637e+24
ZEKROY	0.541315	0.130783	161.57	0.312391	1404.02	141.209	96800700000000	2.96114e+19
ZIHTEP	0.434589	0.168486	108.531	0.349261	1109.96	193.318	6.00255e+23	3.3664e+27
ZIMJOW	0.493461	0.295941	292.915	0.31789	1702.84	103.455	32265100	2.12953e+13

## Sheet: top 200 hMOFs
IDa	LCD (nm)	ϕ	VSA(m2·cm-3)	PLD(nm)	ρ (kg·m-3)	Qst (kJ·mol-1)	KH2O (mol·kg-1·Pa-1)	S0[H2O/(N2+O2)]
16	0.473839	0.371725	292.14	0.280295	1374.72	53.5519	0.0713238	80229.2
19	0.474629	0.46087	270.7	0.217927	1616.4	55.2917	0.13213	964453		a IDs for hypothetical MOFs.[Wilmer, C.E.; Leaf, M.; Lee, C.Y.; Farha, O.K.; Hauser, B.G.; Hupp, J.T.; Snurr, R.Q., Large-scale screening of hypothetical metal–organic frameworks. Nat. Chem. 2012, 4 (2), 83-89.]
723	0.475484	0.322484	219.842	0.213206	1518.8	50.0137	0.00684072	19433.9
3224	0.534408	0.445341	648.713	0.351816	1161.22	36.9806	0.000477226	15595.6
4571	1.29956	0.298624	1790.72	1.18626	544.655	36.8963	0.000662256	15768
6261	0.935322	0.543754	2379.37	0.788433	596.366	46.5373	0.0246511	63370.4
8922	0.540163	0.510162	879.725	0.455861	1283.08	46.9167	0.00606072	27178.1
9619	0.591945	0.334453	1036.96	0.355158	1076.53	42.2304	0.00109716	33047
10540	0.247747	0.439585	0	0.229526	2925.22	244.235	4.18712e+31	1.62923e+38
10543	0.787335	0.552683	2529.29	0.616767	798.902	73.5568	1750.3	6.53097e+09
10681	0.752813	0.468105	1372.06	0.510498	960.517	271.315	1.0634e+37	1.32099e+43
10683	0.641775	0.413569	1623.95	0.477657	891.399	59.6238	1.85006	2.60205e+07
13135	1.50249	0.411785	1737.98	1.35284	416.127	51.3677	0.134264	467819
13136	0.73567	0.244296	1780.77	0.437725	832.255	42.3944	0.011714	24976.5
13741	0.613635	0.566075	1262.26	0.431663	1053.61	53.7131	0.140701	768858
16840	0.695523	0.449828	1574.3	0.552599	898.673	47.0184	0.0105614	40620.8
17464	0.996063	0.228012	1606.64	0.903415	780.456	61.8578	2.29839	3.57448e+06
18545	0.8693	0.435409	1900.84	0.646807	782.396	46.802	0.0157584	61797.6
18889	0.689192	0.39446	2473.51	0.544321	623.421	46.1457	0.00510809	44035.3
18890	1.586	0.164103	1689.56	1.25773	374.19	48.3221	0.0639858	551602
20377	0.4281	0.466321	139.639	0.238196	1185.77	100.845	28009600	70024000000000
20817	0.610931	0.546427	898.427	0.466766	1230.12	35.1035	0.000308638	32868.8
21106	0.452598	0.573217	263.166	0.300853	1065.41	38.8488	0.00299662	21714.6
21183	0.752063	0.30105	2245.95	0.615011	756.724	41.1995	0.00108345	22247.4
22744	0.41729	0.596083	87.1439	0.277732	1683.92	42.6833	0.00161822	48305.1
23275	0.568302	0.38685	1639	0.510569	834.524	45.8019	0.00187146	24431.6
23625	0.873728	0.485901	1966.02	0.60509	828.909	54.1947	0.166803	931860
23629	0.818461	0.414738	1622.18	0.578734	948.798	45.7331	0.00979501	153047
23763	0.517483	0.37454	363.306	0.213658	1579.47	47.5687	0.00436906	20321.2
23841	1.43605	0.650036	1881.14	1.30304	469.896	46.5929	0.00820154	26456.6
23842	0.629111	0.64913	1481.92	0.453438	939.792	178.426	5.84979e+24	1.57676e+31
24212	0.432513	0.60833	111.698	0.221835	1771.54	85.806	45436.6	1.1445e+11
24355	0.838604	0.246979	1796.98	0.674875	880.089	45.975	0.00956292	99613.8
24423	0.580194	0.331125	497.744	0.309746	1585.23	45.6372	0.00729295	202582
24449	0.532928	0.394092	611.664	0.324812	1346.52	44.8259	0.00524022	16688.6
24812	0.667975	0.395037	1739.39	0.528117	1021.27	56.1367	0.302573	343443
25022	0.794701	0.572456	1803.28	0.6038	795.498	109.076	2429940000	1.19701e+16
25359	0.475351	0.39752	1131.59	0.431653	1248.65	49.8892	0.0218303	161706
25411	0.715008	0.702816	1867.04	0.651763	863.227	356.904	4.00444e+65	2.11875e+72
26466	0.66658	0.437105	1387.72	0.503234	1192.6	46.4401	0.00418113	34842.8
27160	0.762416	0.462024	1918.18	0.629354	823.314	58.9754	0.599852	1.32711e+06
27372	0.345952	0.478716	0	0.202781	1374.76	83.7419	4526.05	1.40998e+10
27861	1.39165	0.314021	1899.92	1.25692	485.92	105.557	1071750000	2.65943e+15
29043	0.679319	0.318801	2213	0.571399	668.318	58.8656	3.07431	3.25324e+07
29114	0.449896	0.375409	179.461	0.255157	1103.75	116.968	4671390000	1.83913e+16
29448	0.585598	0.613327	842.228	0.32123	938.392	48.7131	0.0141864	63332.1
29518	1.26532	0.452676	1886.76	1.08491	505.733	40.9584	0.00294258	157357
29782	0.659579	0.452053	1991.5	0.462055	778.083	39.5857	0.000858193	90051.7
30257	0.517875	0.469139	1172.96	0.388297	946.413	96.0203	540075	2.5596e+11
30368	0.426368	0.514249	55.8652	0.144805	1817.68	42.6946	0.0028549	19964.3
31299	0.654245	0.393256	1607.91	0.472374	831.609	48.3076	0.0222708	173991
31595	0.537973	0.579328	528.789	0.347829	956.058	52.7529	0.0211262	46431.2
31786	0.36551	0.415298	0	0.249442	1792.41	49.4965	0.0121995	19550.5
32577	0.402785	0.613877	52.0237	0.245722	1618.98	37.9056	0.000848286	90435.6
32578	0.373281	0.599072	2.64521	0.257752	1621.77	44.5456	0.00242498	16957.9
32613	0.615326	0.508202	1218.41	0.546679	1079.56	47.1537	0.0037703	39562.4
33462	0.551651	0.488282	633.621	0.272354	1049.31	54.2182	0.220191	1.30291e+06
33956	0.471204	0.268403	748.25	0.377119	1454.2	39.3283	0.00114897	127522
33957	0.401115	0.525701	296.862	0.3358	1516.29	38.3973	0.000832282	95995.6
34204	0.698997	0.394321	1443.93	0.527408	1031.63	44.4254	0.00180474	17188
34324	1.28574	0.479067	2259.99	1.10315	555.531	93.2761	16065200	3.82505e+13
34534	1.34342	0.405519	1894.72	1.28147	504.14	98.3437	146011000	4.0003e+14
34632	0.753855	0.619166	2030.87	0.606859	790.911	179.698	4.19623e+24	4.50723e+30
34682	0.391729	0.261511	119.224	0.258543	1857.2	43.5006	0.00325346	24099.7
34809	0.478993	0.453084	376.039	0.34553	1393.48	35.943	0.000354807	16976.4
34810	0.571705	0.60077	1112.33	0.47838	1383.95	34.6647	0.000314453	33346
34852	0.652495	0.519154	1107.09	0.451086	1172.21	40.0055	0.00135775	23695.5
35795	1.22443	0.534484	1892.37	0.939574	617.065	59.2421	0.800162	3.90323e+06
35853	0.450438	0.45698	1315.38	0.377243	1414.22	43.4442	0.00914079	32072.9
36814	0.651761	0.456883	1299.12	0.5864	1007.64	47.2531	0.00540437	28444.1
37077	0.982728	0.502041	1880.63	0.812138	675.128	112.554	63215400000	5.0171e+17
37357	0.595258	0.449571	1695.44	0.490092	866.37	68.7766	57.6679	1.49013e+08
37707	0.703341	0.415099	1454.01	0.410855	878.758	37.7827	0.00063803	47972.2
1000904	0.405542	0.82373	113.605	0.337712	1654.23	45.5338	0.00897133	63626.5
1000907	0.332611	0.8257	0	0.151407	2212.05	53.7924	0.0173081	38207.7
1000995	0.342508	0.75108	0	0.225275	1704.38	45.3025	0.00307883	28774.1
1002389	0.38457	0.05965	12.7511	0.165718	1692.46	67.4675	5.13484	6.01974e+07
1003060	0.500991	0.8915	909.482	0.408047	1034.74	42.1134	0.00254479	17921.1
1004008	1.10477	2.34642e-148	1034.12	0.232846	1418.32	95.7024	114465000	3.23347e+14
1004152	1.10489	0.21968	1026.3	0.176986	1521.78	92.4724	730474000	2.22029e+15
1004402	0.700802	0.00609	1051.59	0.249386	1494.2	43.8466	0.00356827	16293.5
1004632	1.03695	0.50519	1158.42	0.237684	1138.09	86.1314	1620120	1.54297e+13
1004650	1.13162	0.72911	1642.14	0.472515	989.919	47.3573	0.0182007	86670
4000118	0.921616	0.8158	1570.74	0.4229	1008.96	41.6629	0.00582543	21417
4000199	0.969593	0.78049	1085.06	0.209162	1166.46	47.7096	0.00758561	41003.3
4000398	1.04841	0.53361	1143.98	0.184456	1171.21	54.4436	0.106345	718547
5005909	1.00314	0.494037	2174.21	0.711405	647.273	1038.53	1.74609e+193	6.76779e+199
5009575	0.326229	0.45094	0	0.272066	1704.84	49.4659	0.00565904	20729.1
5009704	0.487685	0.604227	598.042	0.347819	1256.25	34.7884	0.000248558	29311.1
5010183	0.375111	0.314152	1.10075	0.201721	1648.24	51.0506	0.0224423	43075.4
5010497	0.842785	0.395252	2033.72	0.538432	820.829	52.4031	0.0244444	41572.1
5011079	0.980781	0.358318	1622.47	0.538633	974.084	43.6427	0.00268427	31691.5
5012292	0.404235	0.465238	113.88	0.184368	1636.02	42.5557	0.00258921	20549.3
5013445	0.980788	0.560806	1582.54	0.53719	960.946	44.4853	0.0049091	149668
5013774	0.675211	0.54515	1072.64	0.381353	1016.41	35.3113	0.0045283	29027.6
5014530	0.565595	0.461688	710.24	0.366577	1255.86	37.1843	0.000868435	16994.8
5015161	0.634164	0.79278	763.427	0.27315	1154.13	36.8713	0.000476673	29607
5015368	0.508299	0.76874	404.32	0.273694	1417.31	46.8957	0.00542024	26440.2
5019214	0.440503	0.8197	239.308	0.320448	1376.29	46.6319	0.00543257	22173.8
5019340	0.345909	0.01201	0	0.253579	1379.35	42.9398	0.00077116	19135.5
5022423	0.491687	0.80668	291.867	0.333366	1314.17	52.2921	0.081179	197036
5025709	0.836809	0.84057	2233.2	0.51781	765.771	40.8843	0.0108819	89195.9
5028126	1.65514	0.71457	1705.75	1.41242	546.451	50.4011	226.434	7.72812e+08
5029518	0.573206	0.16211	1042.17	0.458796	1120.75	37.1845	0.000362394	19379.4
5031918	0.82318	0.44685	1474.13	0.519107	937.297	36.8772	0.00454416	81290.9
5037280	0.358747	0.79444	0	0.268528	1356.62	44.5856	0.00173616	16693.8
5039211	0.605277	0.74711	1973.16	0.49163	730.522	44.1873	0.0392478	31908.8
5040105	0.407819	0.32942	58.8058	0.290663	1275.78	39.9074	0.000916308	72722.9
5041423	0.465535	0.70621	159.1	0.214425	1570.53	50.7477	0.0126794	29904.2
5041867	0.644457	0.87821	691.501	0.318106	1466.66	49.675	0.0194949	20651.4
5042303	0.319986	0.05521	0	0.150412	1712.19	50.2853	0.00605229	27385.9
5043642	0.695082	0.9142	1037.14	0.324094	902.653	93.5171	371798	1.19549e+12
5044679	0.475264	0.16073	260.03	0.227268	1493.48	36.6666	0.000256084	26482.3
5044942	0.438328	0.88188	57.3587	0.203983	1511.79	54.9752	0.0577347	145062
5045039	0.434932	0.71653	249.918	0.302241	1536.41	41.6076	0.00156257	44644.9
5045261	0.393115	0.83695	20.1267	0.159667	1536.76	50.192	0.00867386	19318.2
5045477	0.878561	0.06005	1695.43	0.712595	852.22	57.6497	0.554071	2.53e+06
5046017	0.588426	0.8245	619.192	0.331684	1313.65	43.1436	0.00209782	19605.8
5046026	0.436441	0.60615	137.364	0.204892	1550.62	48.0636	0.00566408	39062.6
5047527	0.44066	0.72371	279.997	0.244563	1197.81	37.7668	0.000521439	55295.8
5049453	1.42898	0.80876	1807.51	1.00889	454.904	395.475	4.85904e+66	1.11702e+73
5049861	0.767916	0.79717	1683.4	0.580708	961.377	375.866	1.13355e+61	3.0228e+67
5050697	0.527695	9.92798e-08	697.373	0.354689	1070.47	37.0795	0.000623477	19362.6
5050824	1.13983	0.00141	2342.31	0.849111	449.435	80.5601	21117.6	4.82137e+10
5051052	0.552423	0.46409	1820.45	0.431928	853.099	74.7493	245.206	1.35473e+09
5052430	0.776549	0.00155	1624.8	0.591288	1034.51	80.7827	1295.12	3.45365e+09
5053749	0.662161	0.53693	1177.89	0.401422	887.656	44.399	0.00448843	18858.9
5053897	0.519152	0.000130051	313.241	0.361001	1168.11	46.6773	0.00620361	29124.9
5054397	0.726268	0.76622	2373.61	0.581123	664.687	73.4768	1356.51	1.59028e+10
5054510	1.44806	0.70091	1773.73	1.2392	384.411	44.3425	0.00918235	20048.8
5054627	0.465375	0.04666	1143.77	0.369867	1273.17	61.6323	7.67933	2.40731e+07
5055209	0.975862	0.80619	2020.89	0.556276	728.193	36.5416	0.000392514	20990.1
5055259	1.14654	1.26228e-06	1888.23	1.07062	494.743	59.0242	6.19383	5.11887e+07
5057274	0.647731	0.58213	1285.88	0.42292	935.268	47.1834	0.00427309	17161
5058695	2.59204	0.6678	1064.93	2.01924	204.76	105.24	290611000	581222000000000
5060125	0.546659	0.52338	1131.13	0.37715	1128.48	35.8831	0.000651262	34458.3
5061090	1.80707	0.63231	1578.39	1.21352	314.887	49.0265	0.0479438	323945
5061091	0.744068	0.62048	2528.9	0.55185	629.773	85.6456	2914040	2.24157e+13
5061092	0.670491	0.70776	955.631	0.338283	944.66	49.185	0.0310785	225207
5061698	0.642489	0.49829	2187.26	0.515951	690.391	52.9704	0.0557517	25341.7
5061907	1.13745	0.54283	1922.1	0.877879	554.303	59.542	50.5721	4.35966e+07
5063904	0.573982	0.77451	678.24	0.340466	1107.06	40.9449	0.00117249	17765
5064365	0.533904	0.45359	451.889	0.238181	1329.7	44.0128	0.00233816	25033.8
5066761	0.524467	0.67032	321.675	0.36062	1660.4	50.2428	0.0195698	37275.8
5067502	0.582353	0.65145	642.666	0.363693	1424.9	40.359	0.00292563	51965
5067641	0.46587	0.03694	375.538	0.311899	1062.43	34.9644	0.000266839	27941.3
5068647	0.475705	0.80353	335.838	0.286545	1187.05	68.7208	154.26	4.79068e+08
5069739	0.844016	0.59464	1811.72	0.58186	816.565	39.9639	0.00125471	22730.3
5069929	0.677456	0.82928	1369.38	0.561936	1016.07	50.0561	0.0240098	492004
5070092	0.493614	0.72791	192.492	0.191794	1502.91	51.2386	0.00978529	28950.6
5070094	0.486608	0.87618	367.334	0.199629	1394.83	45.3771	0.00315362	18550.7
5070137	0.493993	0.1453	417.013	0.333299	1317.92	76.656	332.691	7.86504e+08
5070225	0.391816	0.7341	8.25831	0.151121	1626.68	73.409	96.0874	3.12988e+08
5070347	0.376259	0.80928	10.0935	0.177468	1841.1	47.291	0.00990585	51593
5070399	0.544239	0.90373	414.587	0.33929	1231.19	61.8953	1.491	3.85271e+07
5070468	0.740052	0.62464	1633.92	0.615104	892.185	41.8487	0.0098785	24451.7
5072131	0.660188	0.83559	927.776	0.361519	1089.36	54.5301	0.0762525	127088
5073737	1.27575	0.10601	1945.33	0.941884	475.572	55.4012	4.38307	2.20255e+07
5073890	0.717269	0.58411	1304.05	0.58223	1000.81	47.2414	0.0148996	130698
5074689	0.97263	0.83268	1850.67	0.788097	713.934	49.7418	0.0182355	63538.3
5075573	1.39827	0.7407	1930.01	0.931258	467.507	42.2428	0.00273074	61921.5
5075733	0.807635	0.22727	2116.46	0.585646	819.607	64.388	7.57322	2.32307e+07
5075942	0.738858	4.77199e-05	2584.31	0.570754	649.328	45.591	0.0120439	319467
5076440	1.37907	0.59704	1929.71	0.868389	518.691	97.8762	147393000	3.94099e+14
5076554	0.567233	0.0065	1849.54	0.439572	818.027	105.386	825192000	1.66035e+15
5076673	0.493752	0.76828	750.94	0.370883	1236.41	39.3342	0.000507776	56356.9
5076751	0.593419	0.6692	1046.73	0.459685	1157.07	46.898	0.00513923	120639
5077022	0.436887	0.22636	207.104	0.320245	1051.6	145.656	439377000000000	1.27726e+21
5078347	0.64956	0.36676	2147.74	0.556188	689.238	459.929	1.61436e+77	4.05618e+82
5078349	0.620798	0.81125	2748.47	0.518862	672.5	65.2915	139.447	1.91285e+08
5078449	0.742254	0.0545	2637.56	0.564998	602.757	64.8785	127.34	2.48711e+08
5079302	0.437823	0.86605	698.615	0.329952	1268.63	41.9811	0.00381705	36352.9
5079416	0.52894	0.7071	836.551	0.361045	1138.31	40.7265	0.00148395	20812.8
5079423	0.728304	0.79043	1990.11	0.529077	855.877	226.524	2.74954e+33	4.11608e+39
5080421	0.758581	0.00979	1764.31	0.577496	880.25	44.8114	0.0108728	49875.2
5080871	1.83052	0.8733	1456.71	1.43404	302.098	101.665	5659690000000	1.48159e+19
5081119	1.84725	0.0109	2006.36	1.63803	429.422	69.1733	23.3151	9.55537e+06
5081775	0.336514	0.83208	0	0.257302	1848.7	49.0068	0.00651823	17760.8
5081781	0.486667	0.67629	436.688	0.370781	1380.27	41.9437	0.00260301	25519.7
5081886	0.622849	0.03379	1599.74	0.462096	920.827	123.678	39884300000000	1.28245e+20
5082108	0.661798	2.94108e-07	1876.3	0.579459	907.262	150.814	3.52691e+17	1.19963e+24
5082186	1.63106	0.55034	1754.02	1.44831	379.406	47.584	0.0285537	86265
5082187	0.778881	0.0012	1931.89	0.501986	758.813	80.8327	33345	1.17412e+11
5082899	1.92649	0.08871	1604.49	1.42185	325.405	73.5019	573.502	1.66232e+09
6002164	0.445738	0.59268	103.726	0.271372	1670.02	47.9061	0.00600715	69286.6
6002787	0.390223	0.76583	18.5805	0.259914	1266.68	56.3542	0.0887578	210327
6003365	0.375067	0.20817	3.28893	0.175341	1536.59	44.7169	0.000790448	23808.7
6003993	0.668838	0.78051	1044	0.544818	954.494	40.8802	0.00272447	15932.6
6004162	0.729445	0.80129	1242.85	0.59248	1239.67	50.4188	0.0516846	160014
6005130	0.725615	0.58875	1184.77	0.617589	1037.18	37.5294	0.000686336	73326.5
7000655	0.704665	0.45524	984.978	0.181895	1598.2	65.2463	6.19083	2.31001e+07
7000698	0.844352	2.088e-10	819.75	0.23361	1372	49.6156	0.00588015	16657.6
7000805	0.554728	0.6557	167.702	0.2106	1844.57	125.496	341020000000	6.5834e+17
7000857	0.602264	0.05629	192.46	0.126765	1887.32	66.5471	49.7375	7.46809e+07
7000861	0.606583	0.06805	296.426	0.145414	1941.48	56.3992	0.0568002	157341
7001320	0.595611	0.83388	199.345	0.14189	1845.32	46.4241	0.00263565	850210
7001833	0.678488	0.691	749.591	0.263429	1343.94	160.819	1.68094e+19	1.15133e+25
7002147	1.10539	0.54997	1008.94	0.279736	1295.41	93.1864	11095600	4.25119e+13
7002259	0.625383	0.76529	263.706	0.121381	1916.57	47.6127	0.00190557	24336.8
7002432	1.19931	0.06564	1861.37	0.827064	666.789	68.7653	105.419	1.90287e+08
